# Supplementary material for: Case report: A novel frameshift mutation in BRSK2 causes autism in a 16-year old Chinese boy
Source: Front Psychiatry. 2023 Aug 21;14:1205204. doi: 10.3389/fpsyt.2023.1205204 (PMC10476520; doi:10.3389/fpsyt.2023.1205204)
Supplement: Supplementary file 1 [file Table_1.XLSX]

## Sheet: Sheet1
TableS1. Clinical Characteristics of individuals with BRSK2 variations
Proband	Our Proband	1(Hiatt et al., 2019)	2(Zhou X et al. 2022)	3(Zhou X et al. 2022)	4(Hiatt et al., 2019)	5(Hiatt et al., 2019)	6(Hiatt et al., 2019)	7(Deng J et al, 2022)	8(Hiatt et al., 2019)	9(Feliciano et al., 2019)	10(Hiatt et al., 2019)	11(Hiatt et al., 2019)	12(Zhou X et al. 2022)	13(Hiatt et al., 2019)	14(Zhou X et al. 2022)	15(Hiatt et al., 2019)	16(Zhou X et al. 2022)	17(Zhou X et al. 2022)	18(Zhou X et al. 2022)	19(Mahjani B et al. 2021)
Gender	Male	Male	Female	Male	Male	Female	Male	Male	Male	Male	Male	Male	Male	Male	Female	Male	Male	Male	Male	Female
Age at last evaluation(years)	16	5	5	16	14	5.6	3.8	4.5	19	19	4	6.8	8	10.9	8	4.6	Unknown	Unknown	Unknown	Unknown
Gestational age	Full-term birth	Post-term birth, 42 weeks	Full-term birth	Full-term birth	Full-term birth	Unknown	Unknown	Full-term birth	Full-term birth	Premature birth, 24weeks	Full-term birth	Full-term birth	Full-term birth	Unknown	Full-term birth	Unknown	Unknown	Unknown	Unknown	Unknown
Variant	c.442del(p.L148Cfs*39)	c.194G>A (p.R65Q)	c.196G>A (p.E66K)	c.272+2T>C	c.273–1G>A	c.530＋1G>A	c.635G>A (p. G212E)	c.664C>T（p. R222X）	c.730C>T (p. Q244X)	c.951-1G＞A	c.1281_ 1287+5del12	c.1395_1396del (p. S466Qfs*83)	c.1502del (p.T501Sfs*8)	c.1532_1533del (p. E511Vfs*38)	c.1737dup (p.P580Afs*13)	c.1861C>T (p.R621C)	c.488C>T(p.A163V)	c.977+5G>A	c.1301_1307del(p.P434Qfs*73)	c.1532dup(p.S512VfsTer84)
Predicted effect	Frameshift	Missense	Missense	Splice alteration	Splice alteration	Splice alteration	Missense	Nonsense	Nonsense	Splice alteration	Frameshift	Frameshift	Frameshift	Frameshift	Frameshift	Missense	Missense	Splice alteration	Frameshift	Frameshift
Sequencing method	exome	exome	exome	exome	exome	genome	genome	exome	exome	exome	exome	exome	exome	genome	exome	genome	exome	exome	exome	exome
Inheritance	de novo	de novo	de novo	de novo	de novo	de novo	de novo	de novo	de novo	de novo	unknown	de novo	de novo	de novo	de novo	Unknown	de novo	de novo	de novo	de novo
CADD		25.3	26.8	23.6	24.8	26.5	26.9	NA	38	22.6	32	34	.	34	NA	29.2	NA	NA	NA	NA
ASD	Yes	Yes	Yes	Yes	Yes	Yes	Yes	Yes	Yes	Yes	Yes	Yes	Yes	Yes	Yes	Yes, borderline	Unknown	Unknown	Unknown	Unknown
Intellectual Disability	Yes, mild	Yes, moderate	Yes (fsiq_score=49)	No	Yes, severe	Yes, mild	Yes, moderate	NO, FSIQ=81	Yes, mild to severe, FSIQ=77 at 5 years	Yes, severe, IQ≤25	Unknown	Yes, mild	Yes	Yes, moderate	No	Yes, moderate	Unknown	Unknown	Unknown	Unknown
Speech delay at first evaluation	Yes	Yes	Yes, Combines 3 words together into short sentences	Yes, Uses longer sentences of his/her own and is able to tell you something that happened	Yes, with regression	Yes	Yes, with regression	Yes	Yes, with regression	Yes	Yes	Yes	Yes, Uses single words meaningfully (for example, to request)	Yes	Yes, Uses longer sentences of his/her own and is able to tell you something that happened	Yes	Unknown	Unknown	Unknown	Unknown
Motor delay at first evaluation	NO	Yes	NO	Yes	Yes	Yes, fine motor	NO	Yes	Yes, fine motor, with regression	Yes	Yes, gross motor	Yes, fine motor	Yes	Yes, gross motor	NO	Yes	Unknown	Unknown	Unknown	Unknown
Morphological features	None reported	Flat nasal bridge, short philtrum, pouting lower lip, full eyelids, high forehead, widely spaced nipples, torticollis	None reported	None reported	None reported	Upslanting palpebral fissures, large eyes, beaked shaped nose	Downslanting palpebral fissures	None reported	Mild, Upslanting palpebral fissures, synophrys, deep-set eyes, short first digits of feet	Unknown	Close set eyes, transverse palmar crease on the left, supernumerary nipple on the right	Upslanting palpebral fissures, brachycephaly, broad/prominent forehead, narrow nose, long philtrum, broad mouth with thick lower lip and cupid’s bow upper lip, triangular face with pointed chin	None reported	Heart-shaped face, down slanting palpebral fissures	None reported	Retrognathia, telecanthus, epicanthal folds, upturned ear lobes, oval-shaped face	None reported	None reported	None reported	Unknown
Other comorbidities	ADHD, acousma, limb tremors, and abnormal brain electrical activity mapping	Hypermetroia，intermittent honrizontal nystagmus	Sleep disorder	developmental delay; Obsessive-Compulsive Disorder; Anxiety; Tourette Syndrome	Sleep disorder, epilepsy at 9 years old	Dysoraxia, mild gait ataxia, tremors	Undescended testis	Feeding problem, enuresis	Disintergration disorder, schizophrenia	Feeding problem, vision/hearing, encopresis, enuresis	Sleep disorder, mild hypotonia	Epilepsy twice	Intellectual disability; Speech articulation problems; Motor delay	None reported	None reported	Mild laryngomalacia and subglottic stenosis, sleep apnea, astigmatism, two episodes of tachycardia	None reported	None reported	None reported	None reported
